# Supplementary material for: Enhanced Lithium Storage in Hierarchically Porous Carbon Derived from Waste Tea Leaves
Source: PubMed Central journal article supplement (PMC5155420; doi:10.1038/srep39099), 2016-12-14
Supplement: srep39099-s1.pdf [file srep39099-s1.pdf]

Supporting Information for

**Enhanced Lithium Storage in Hierarchically Porous Carbon  
Derived from Waste Tea Leaves**

**Changhoon Choi<sup>1</sup>, Seung-Deok Seo<sup>1</sup>, Byung-Kook Kim<sup>2</sup>, and Dong-Wan Kim<sup>1,\*</sup>**

<sup>1</sup> School of Civil, Environmental and Architectural Engineering, Korea University, Seoul 136-713, Republic of Korea

<sup>2</sup> High-Temperature Energy Materials Research Center, Korea Institute of Science and Technology, Seoul 136-791, Republic of Korea

\* Corresponding author

Prof. Dong-Wan Kim (D.-W. Kim)

Tel: +82-2-3290-4863

E-mail: [dwkim1@korea.ac.kr](mailto:dwkim1@korea.ac.kr)

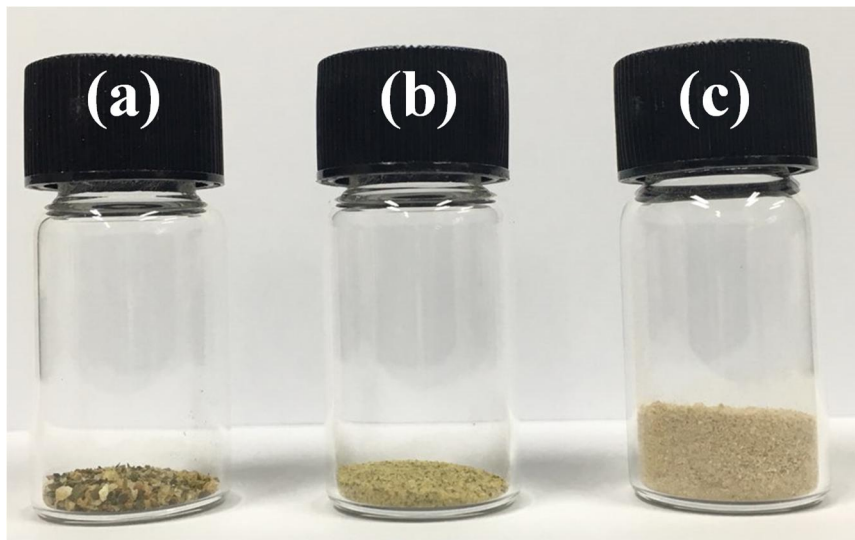

**Supplementary Figure S1.** Digital photograph to confirm volume change of (a) raw tea wastes, (b) crushed powder, and (c) acid-treated powder in the same weight (0.1 g).

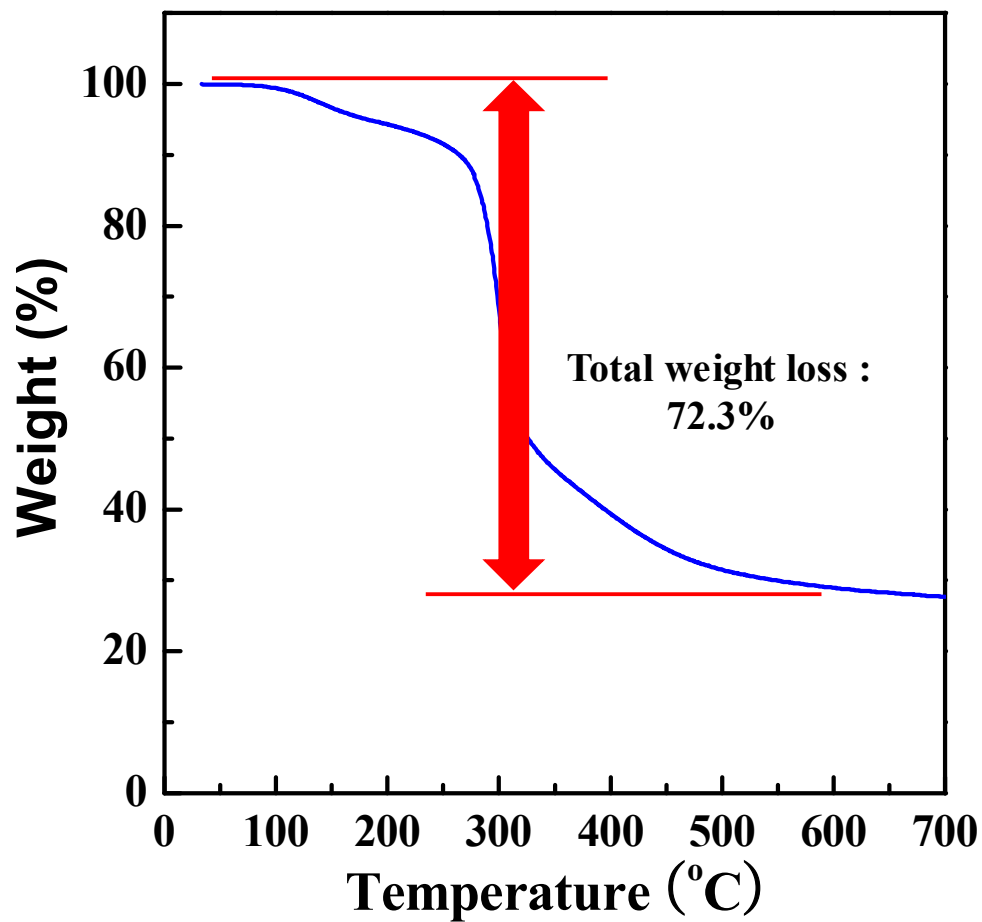

**Supplementary Figure S2.** TGA data of tea wastes between room temperature and 700 °C at a heating rate of 10 °C min<sup>-1</sup> in argon atmosphere.

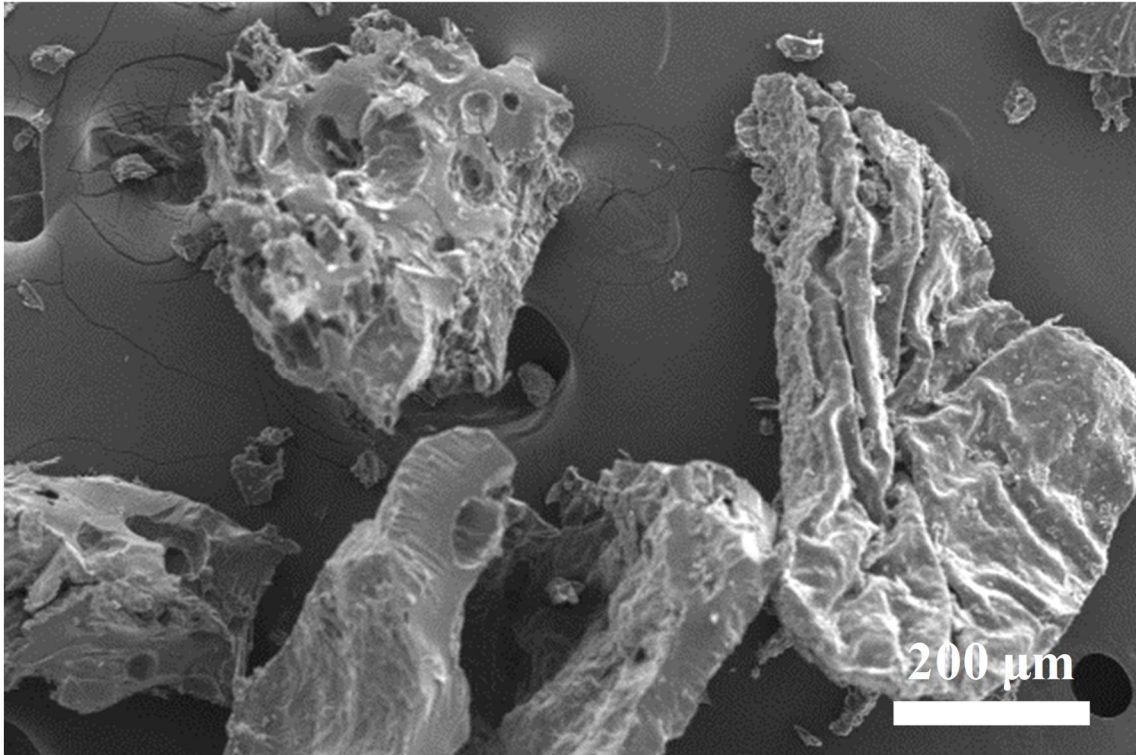

**Supplementary Figure S3.** Low magnification SEM image of washed tea wastes.

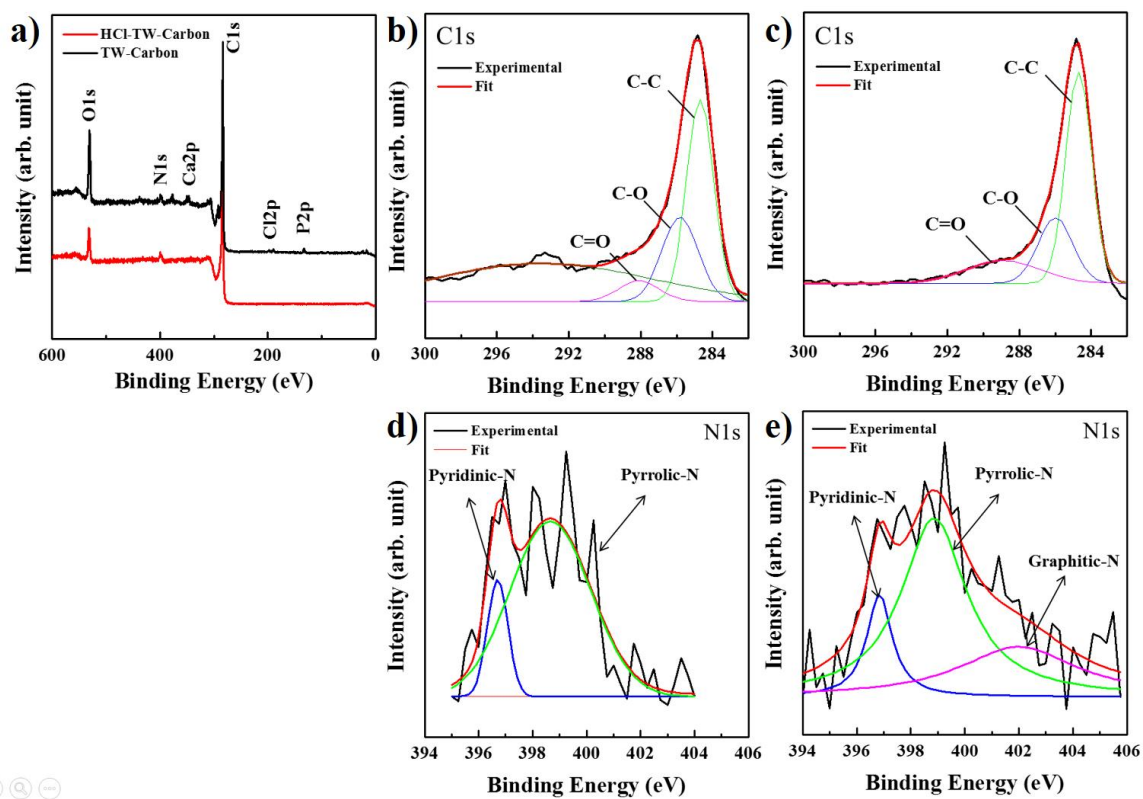

**Supplementary Figure S4.** a) The XPS survey spectra, b, c) C1s spectra and d, e) N1s spectra of TW-Car and HCl-TW-Car samples, respectively.

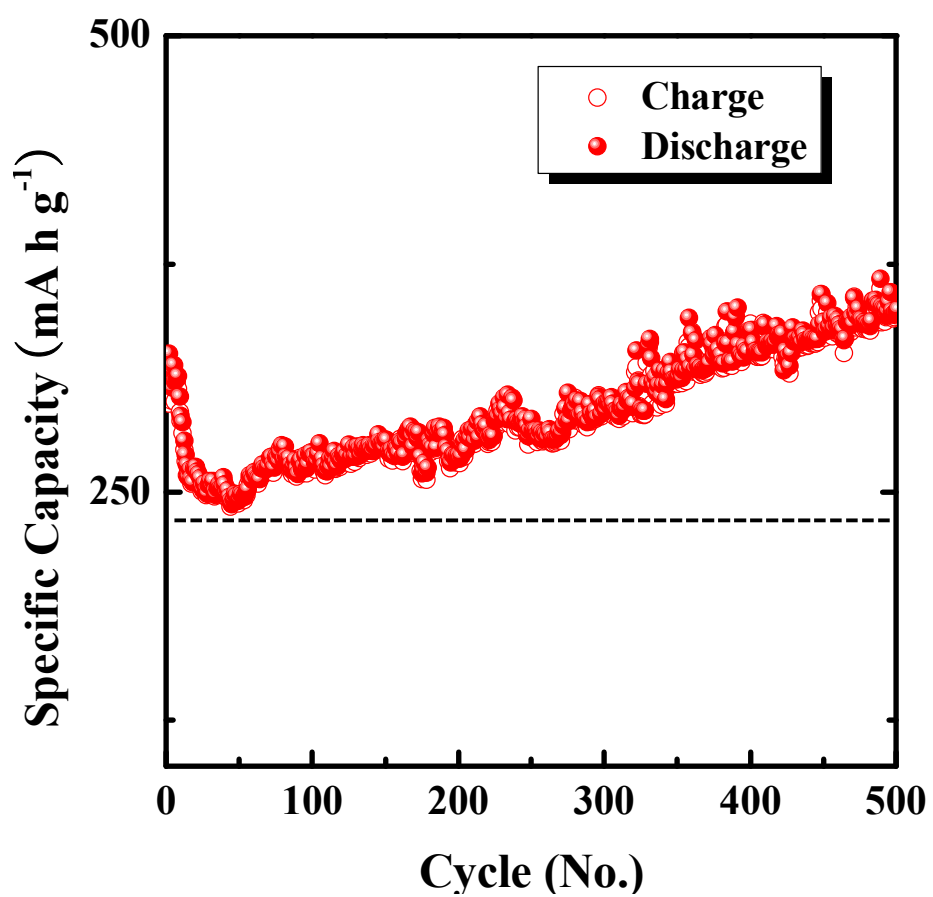

Supplementary Figure S5. Cycling performance of TW-Car at 0.2 C for 500 cycles.

**Supplementary Table S1.** Quantitative results of elemental ratio (wt%) by SEM-EDS analysis of TW-Car and HCl-TW-Car. (Pt\*: from Pt sputtering)

| <b>Sample</b>     | C     | O     | N     | S    | P    | K    | Ca   | Mg   | Si   | Al   | Na   | <b>Pt*</b>  |
|-------------------|-------|-------|-------|------|------|------|------|------|------|------|------|-------------|
| <b>TW-Car</b>     | 43.51 | 48.37 | 4.00  | 0.59 | 0.53 | 0.52 | 0.14 | 0.12 | 0.11 | 0.10 | 0.09 | <b>4.81</b> |
| <b>HCl-TW-Car</b> | 44.82 | 34.82 | 13.78 | 0.57 | 0.19 | X    | X    | X    | 0.20 | X    | X    | <b>5.62</b> |
